# Supplementary material for: Solvent extraction in extended hydrogen bonded fluids – separation of Pt(iv) from Pd(ii) using TOPO-based type V DES
Source: Royal Society of Chemistry journal article supplement (doi:10.1039/d1gc00829c), 2021-01-01
Supplement: d1gc00829c1.pdf [file d1gc00829c1.pdf]

# **Solvent extraction in extended hydrogen bonded fluids – separation of Pt(IV) from Pd(II) using TOPO-based Type V DES**

Silvia J.R. Vargas,<sup>1</sup> Germán Pérez-Sánchez,<sup>1</sup> Nicolas Schaeffer,<sup>1\*</sup> João A.P. Coutinho<sup>1</sup>

<sup>1</sup> CICECO - Aveiro Institute of Materials, Department of Chemistry, University of Aveiro, 3810-193 Aveiro, Portugal.

\* Corresponding author: nicolas.schaeffer@ua.pt

Number of pages – 10

Number of Figures – 9

Number of Tables – 3

## FIGURES

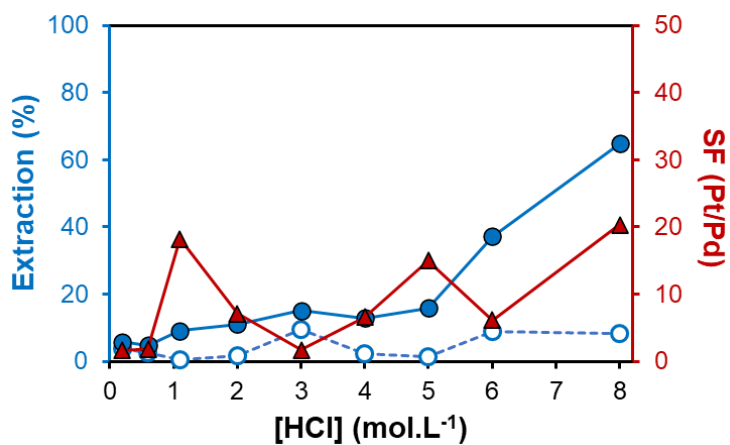

**Figure S1.** Pt(IV) (filled symbols) and Pd(II) (empty symbols) extraction efficiencies and Pt/Pd selectivity in the TOPO + C<sub>10</sub>H<sub>19</sub>OOH eutectic for  $x_{\text{TOPO}}$  of 0.2 as a function of the initial aqueous phase HCl concentration.

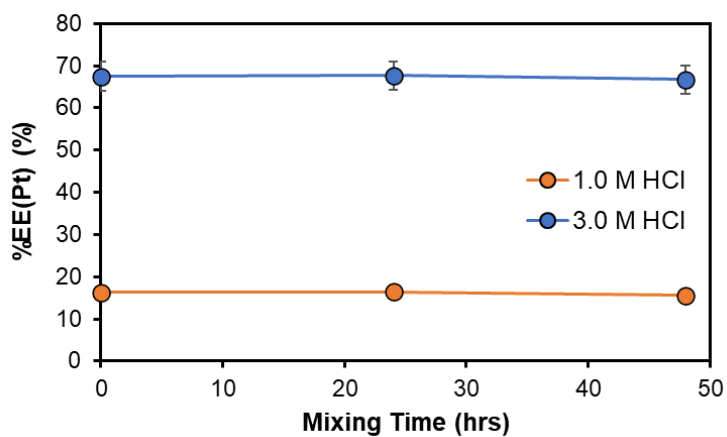

**Figure S2.** Platinum(IV) extraction efficiency in the TOPO + C<sub>10</sub>H<sub>19</sub>OOH eutectic for  $x_{\text{TOPO}}$  of 0.3 as a function of the initial aqueous phase HCl concentration and mixing time.

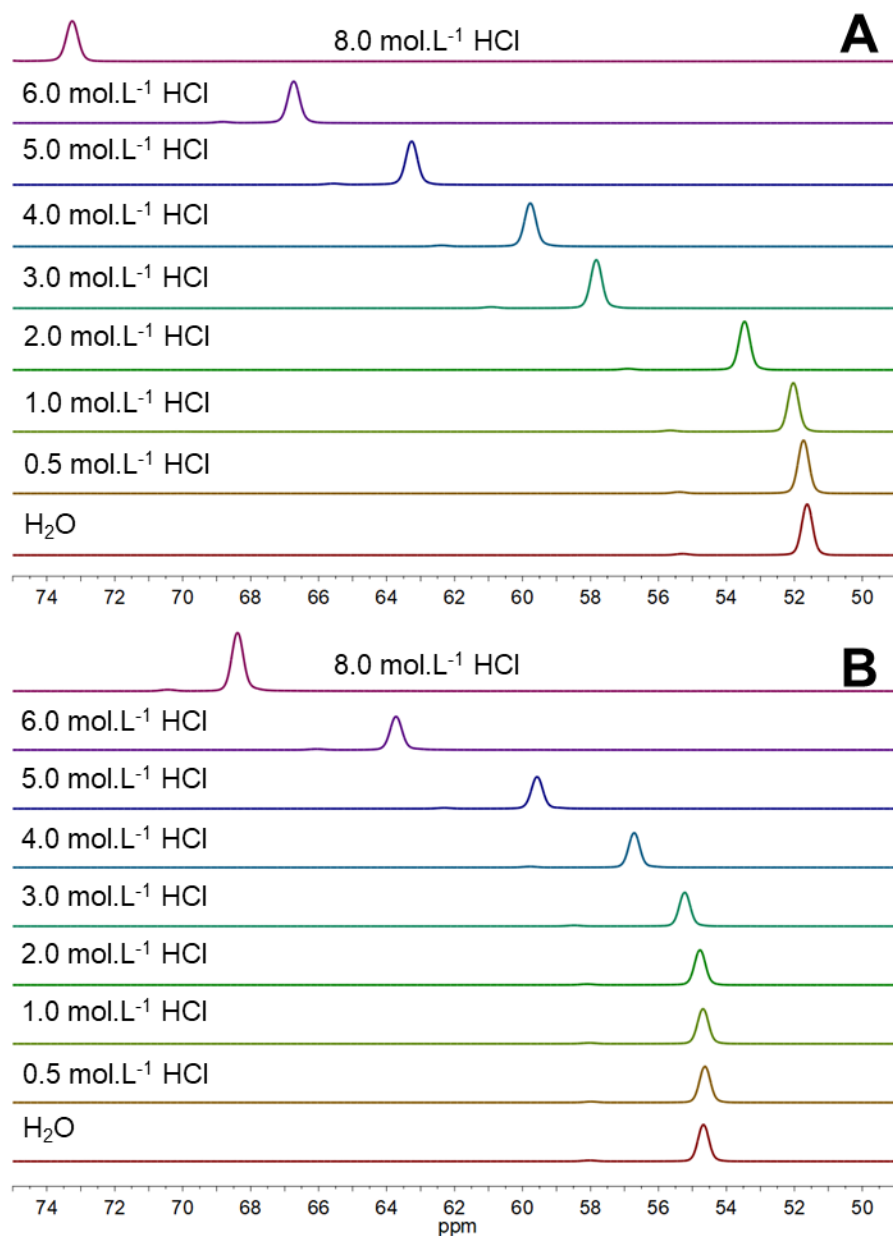

**Figure S3.**  $^{31}\text{P}$ -NMR spectra of the TOPO +  $\text{C}_{10}\text{H}_{19}\text{OOH}$  eutectic phase after equilibration with various HCl solutions for A)  $x_{\text{TOPO}} = 0.5$  and B)  $x_{\text{TOPO}} = 0.3$ .  $\text{D}_2\text{O}$  in a co-axial insert was used as solvent.

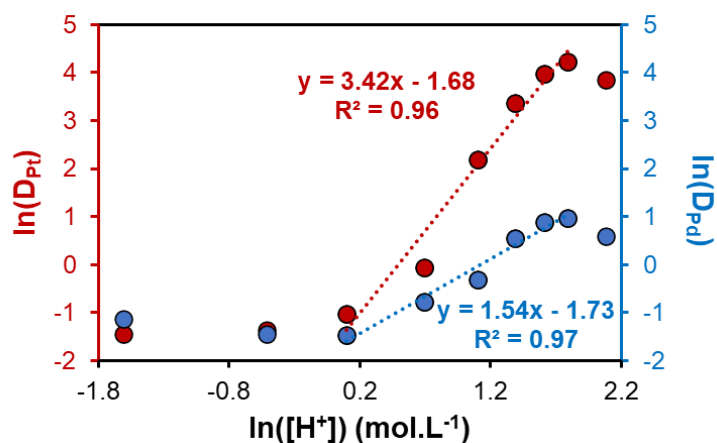

**Figure S4.** Pt(IV) and Pd(II) distribution coefficients to the TOPO + C<sub>10</sub>H<sub>19</sub>OOH eutectic phase as a function of the initial aqueous phase HCl concentration for  $x_{\text{TOPO}} = 0.4$ .

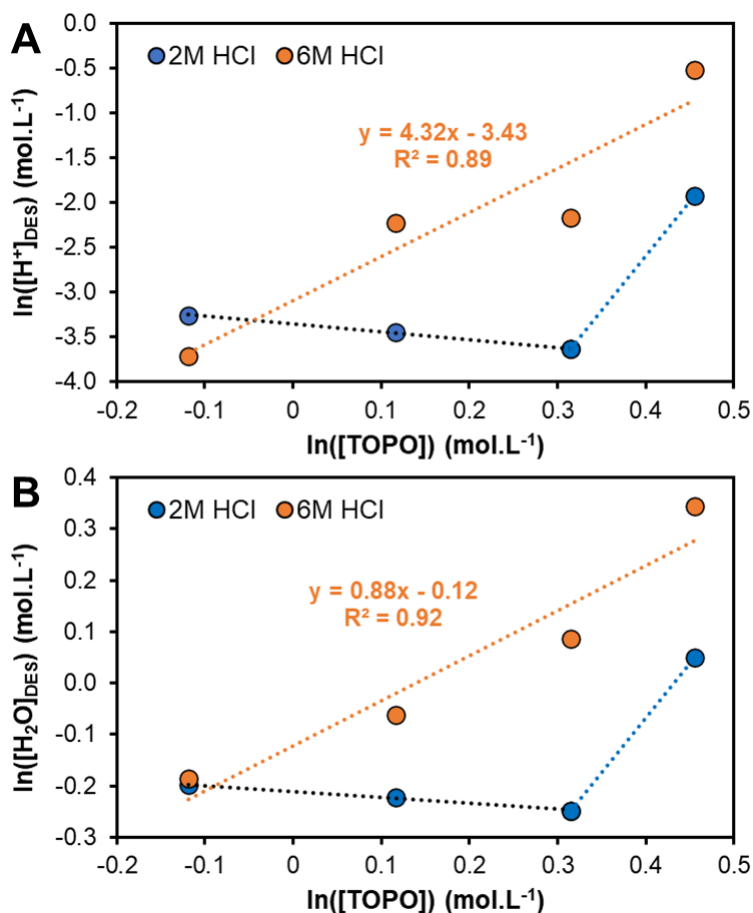

**Figure S5.** Pt(IV) and Pd(II) distribution coefficients to the TOPO + C<sub>10</sub>H<sub>19</sub>OOH eutectic phase as a function of the initial aqueous phase HCl concentration for  $x_{\text{TOPO}} = 0.4$ .

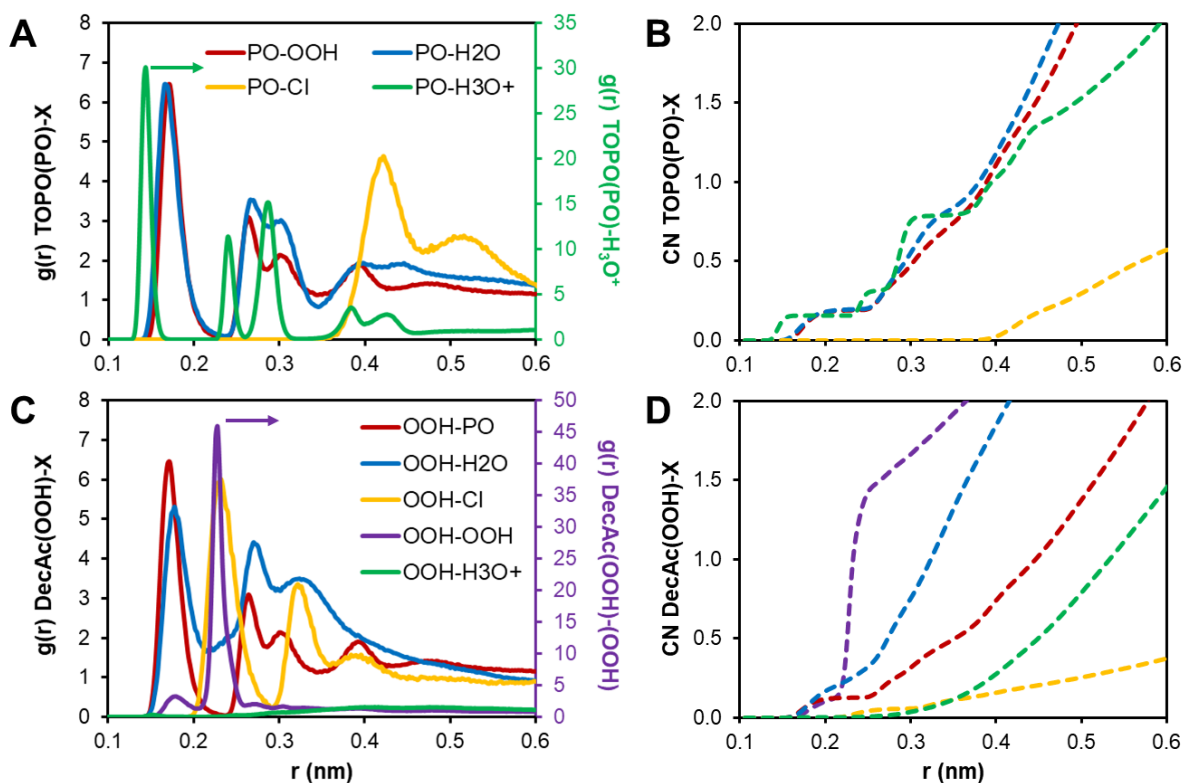

**Figure S6.** Radial distribution function (A and C) and corresponding coordination numbers (B and D) for TOPO reference (top panels) and  $C_{10}H_{19}OOH$  reference (bottom panels) in the TOPO +  $C_{10}H_{19}OOH$  eutectic for  $x_{TOPO} = 0.5$  (composition – system (8) in **Table S2**). The P=O group was selected for TOPO and the OOH group for  $C_{10}H_{19}OOH$ .

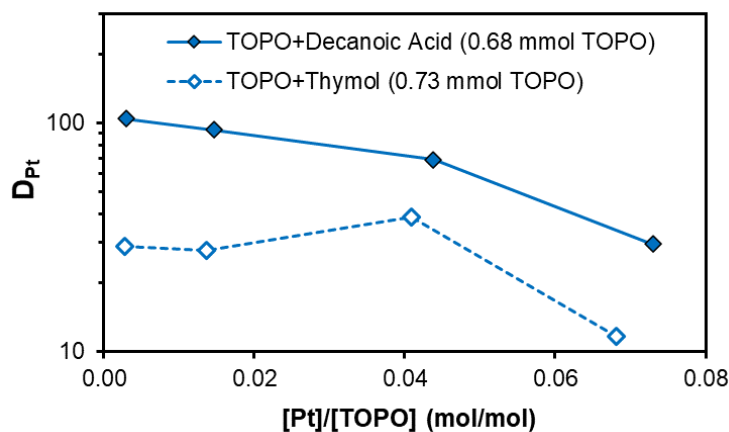

**Figure S7.** Pt(IV) distribution coefficient in the TOPO +  $C_{10}H_{19}OOH$  (filled symbol) and TOPO + thymol (empty symbols) eutectics for  $x_{TOPO} = 0.4$  and  $8.0 \text{ mol.L}^{-1}$  HCl as a function of initial metal concentration of  $2.0 \times 10^{-3}$ , 0.01, 0.03 and  $0.05 \text{ mol.L}^{-1}$ .

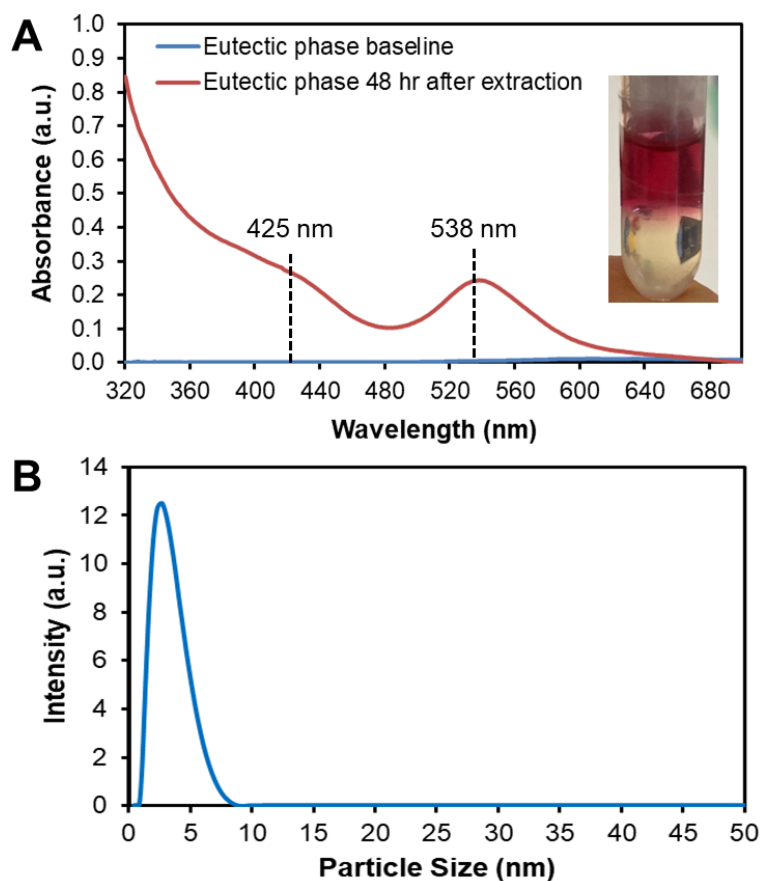

**Figure S8.** A) UV-vis spectra of the TOPO + thymol eutectic phase ( $x_{\text{TOPO}} = 0.4$ ) 48 hr after extraction of  $2.0 \times 10^{-3} \text{ mol.L}^{-1}$  Pt(IV) from  $8.0 \text{ mol.L}^{-1}$  HCl. Inset photo shows the appearance of the red DES phase after 48 hrs. B) Particle size distribution of the eutectic phase shown in A) diluted in ethanol.

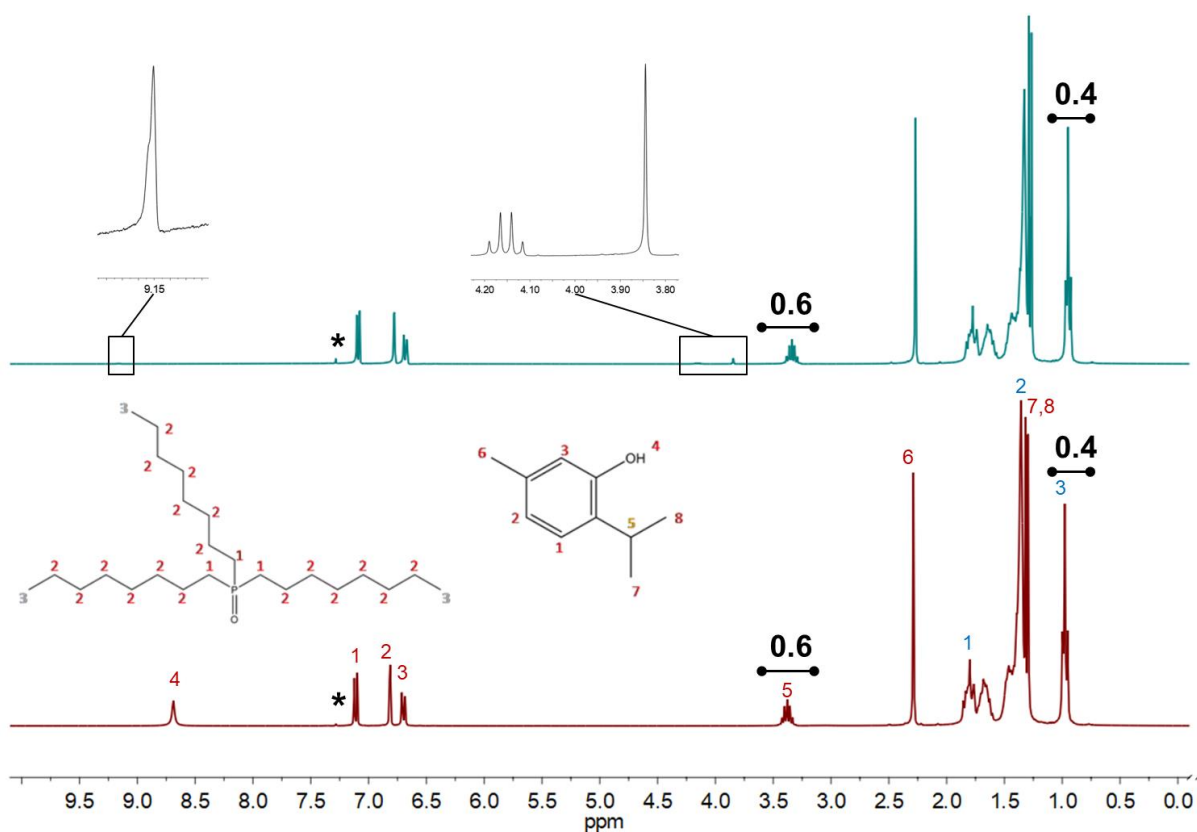

**Figure S9.** <sup>1</sup>H-NMR spectra and identified peaks of the TOPO + Thymol ( $x_{\text{TOPO}} = 0.4$ ) eutectic phase after preparation (bottom) and after five extraction and stripping cycles using  $0.1 \text{ mol.L}^{-1}$  in  $0.5 \text{ mol.L}^{-1}$  HCl as stripping solution ( $x_{\text{TOPO}} = 0.4$ , O/A = 1, [M] =  $2.0 \text{ mmol.L}^{-1}$ , [HCl] =  $2.0 \text{ mol.L}^{-1}$ ). Chloroform solvent is identified by the asterisk. Shift of acidified thiourea is highlighted at  $\delta = 9.15 \text{ ppm}$ .

## TABLES

**Table S1.** Experimentally determined platinum(IV) and palladium(II) extraction efficiencies (%EE<sub>M</sub>), distribution coefficients (D<sub>M</sub>) and separation factors (SF) in the TOPO + C<sub>10</sub>H<sub>19</sub>OOH system as a function of the initial aqueous phase HCl concentration and TOPO molar fraction (x<sub>TOPO</sub>). An organic to aqueous phase volumetric ratio of 0.5 was used throughout.

| HCl<br>(mol L <sup>-1</sup> ) | TOPO + C <sub>10</sub> H <sub>19</sub> OOH (x <sub>TOPO</sub> = 0.3) |                   |                 |                 |                     | TOPO + C <sub>10</sub> H <sub>19</sub> OOH (x <sub>TOPO</sub> = 0.4) |                   |                 |                 |                     | TOPO + C <sub>10</sub> H <sub>19</sub> OOH (x <sub>TOPO</sub> = 0.5) |                   |                 |                 |                     |
|-------------------------------|----------------------------------------------------------------------|-------------------|-----------------|-----------------|---------------------|----------------------------------------------------------------------|-------------------|-----------------|-----------------|---------------------|----------------------------------------------------------------------|-------------------|-----------------|-----------------|---------------------|
|                               | %EE <sub>Pd</sub>                                                    | %EE <sub>Pt</sub> | D <sub>Pd</sub> | D <sub>Pt</sub> | SF <sub>Pt-Pd</sub> | %EE <sub>Pd</sub>                                                    | %EE <sub>Pt</sub> | D <sub>Pd</sub> | D <sub>Pt</sub> | SF <sub>Pt-Pd</sub> | %EE <sub>Pd</sub>                                                    | %EE <sub>Pt</sub> | D <sub>Pd</sub> | D <sub>Pt</sub> | SF <sub>Pt-Pd</sub> |
| 0.25                          | 3.86                                                                 | 3.86              | 0.04            | 0.04            | 1.00                | 24.29                                                                | 19.03             | 0.32            | 0.24            | 0.73                | 76.95                                                                | 77.90             | 3.34            | 3.53            | 1.06                |
| 0.60                          | 2.33                                                                 | 4.33              | 0.02            | 0.05            | 1.90                | 19.14                                                                | 20.56             | 0.24            | 0.26            | 1.09                | 77.33                                                                | 94.94             | 3.41            | 18.76           | 5.50                |
| 1.10                          | 3.48                                                                 | 3.48              | 0.04            | 0.04            | 1.00                | 18.86                                                                | 26.38             | 0.23            | 0.36            | 1.54                | 82.76                                                                | 98.12             | 4.80            | 52.14           | 10.86               |
| 2.00                          | 3.38                                                                 | 4.20              | 0.03            | 0.04            | 1.25                | 31.50                                                                | 48.59             | 0.46            | 0.95            | 2.06                | 87.62                                                                | 99.15             | 7.08            | 116.38          | 16.44               |
| 3.00                          | 12.67                                                                | 27.42             | 0.15            | 0.38            | 2.60                | 42.55                                                                | 90.02             | 0.74            | 9.02            | 12.18               | 90.76                                                                | 99.67             | 9.82            | 306.34          | 31.18               |
| 4.00                          | 19.05                                                                | 53.43             | 0.24            | 1.15            | 4.88                | 63.33                                                                | 96.65             | 1.73            | 28.87           | 16.71               | 92.95                                                                | 99.69             | 13.19           | 320.39          | 24.29               |
| 5.00                          | 27.43                                                                | 77.09             | 0.38            | 3.36            | 8.90                | 70.95                                                                | 98.17             | 2.44            | 53.70           | 21.98               | 90.38                                                                | 99.69             | 9.40            | 316.99          | 33.74               |
| 6.00                          | 41.14                                                                | 88.60             | 0.70            | 7.77            | 11.11               | 72.76                                                                | 98.57             | 2.67            | 68.74           | 25.73               | 89.90                                                                | 99.63             | 8.91            | 270.23          | 30.34               |
| 8.00                          | 37.24                                                                | 92.22             | 0.59            | 11.85           | 19.97               | 64.57                                                                | 97.92             | 1.82            | 47.11           | 25.85               | 82.10                                                                | 99.51             | 4.59            | 202.21          | 44.10               |



**Table S2.** System composition for all-atom molecular dynamic simulations at 298 K based on experimentally measure DES phase composition. All systems contain a total of 400 TOPO and C<sub>9</sub>H<sub>19</sub>COOH atoms with 120 TOPO molecules for  $x_{\text{TOPO,ini}} = 0.3$  and 200 for  $x_{\text{TOPO,ini}} = 0.5$ .  $x_{(\text{HCl}+\text{H}_2\text{O}),f}$  represents the experimentally determined molar fraction of HCl and H<sub>2</sub>O in the DES phase based on [HCl]<sub>DES,f</sub> and [H<sub>2</sub>O]<sub>DES,f</sub>. The suffixes *DES* and *aq* denote the DES and aqueous phase respectively whilst *f* and *ini* indicate the sampling timeframe, final and initial respectively. HCl was considered as fully dissociated and simulated as the H<sub>3</sub>O<sup>+</sup> and Cl<sup>-</sup> ions.

| System | [HCl] <sub>aq,ini</sub><br>(mol.L <sup>-1</sup> ) | $x_{\text{TOPO,ini}}$ | [HCl] <sub>DES,f</sub><br>(mol.L <sup>-1</sup> ) | [H <sub>2</sub> O] <sub>DES,f</sub><br>(mol.L <sup>-1</sup> ) | $x_{(\text{HCl}+\text{H}_2\text{O}),f}$ | n(H <sub>2</sub> O) | n(HCl) |
|--------|---------------------------------------------------|-----------------------|--------------------------------------------------|---------------------------------------------------------------|-----------------------------------------|---------------------|--------|
| 1      | 0.0                                               | 0.30                  | 0.000                                            | 0.000                                                         | 0.00                                    | 0                   | 0      |
| 2      | 0.0                                               | 0.30                  | 0.000                                            | 0.735                                                         | 0.17                                    | 80                  | 0      |
| 3      | 2.0                                               | 0.30                  | 0.032                                            | 0.802                                                         | 0.19                                    | 88                  | 4      |
| 4      | 6.0                                               | 0.30                  | 0.108                                            | 0.936                                                         | 0.22                                    | 103                 | 12     |
| 5      | 0.0                                               | 0.50                  | 0.000                                            | 0.000                                                         | 0.00                                    | 0                   | 0      |
| 6      | 0.0                                               | 0.50                  | 0.000                                            | 0.988                                                         | 0.24                                    | 128                 | 0      |
| 7      | 2.0                                               | 0.50                  | 0.145                                            | 1.050                                                         | 0.28                                    | 137                 | 19     |
| 8      | 6.0                                               | 0.50                  | 0.593                                            | 1.409                                                         | 0.40                                    | 189                 | 79     |

**Table S3.** Experimentally determined platinum(IV) and palladium(II) extraction efficiencies (%EE<sub>M</sub>), distribution coefficients (D<sub>M</sub>) and separation factors (SF) in the TOPO + Thymol ( $x_{\text{TOPO}} = 0.4$ ) system as a function of the initial aqueous phase HCl concentration. An organic to aqueous phase volumetric ratio of 0.5 was used throughout.

| HCl<br>(mol L <sup>-1</sup> ) | TOPO + Thymol ( $x_{\text{TOPO}} = 0.4$ ) |                   |                 |                 |                             |
|-------------------------------|-------------------------------------------|-------------------|-----------------|-----------------|-----------------------------|
|                               | %EE <sub>Pd</sub>                         | %EE <sub>Pt</sub> | D <sub>Pd</sub> | D <sub>Pt</sub> | $\Sigma\Phi_{\text{Pt-Pd}}$ |
| 0.25                          | 0.28                                      | 11.90             | 0.00            | 0.14            | 47.64                       |
| 0.60                          | 1.18                                      | 14.33             | 0.01            | 0.17            | 13.97                       |
| 1.10                          | 1.64                                      | 23.21             | 0.02            | 0.30            | 18.07                       |
| 2.00                          | 4.26                                      | 63.10             | 0.04            | 1.71            | 38.41                       |
| 3.00                          | 16.52                                     | 84.97             | 0.20            | 5.65            | 28.56                       |
| 4.00                          | 26.15                                     | 87.58             | 0.35            | 7.05            | 19.90                       |
| 5.00                          | 27.62                                     | 90.53             | 0.38            | 9.55            | 25.04                       |
| 6.00                          | 25.00                                     | 91.26             | 0.33            | 10.44           | 31.32                       |
| 8.00                          | 19.19                                     | 89.39             | 0.24            | 8.42            | 35.48                       |
